# Supplementary material for: Cascade-Enhanced Lateral Flow Immunoassay for Sensitive Detection of Okadaic Acid in Seawater, Fish, and Seafood
Source: MDPI journal article supplement (doi:10.3390/foods11121691), 2022-06-09
Supplement: s1 [file s1]

Supplementary Material

# Cascade-enhanced lateral flow immunoassay for sensitive detection of phycotoxin okadaic acid in seawater, fish, and sea-food

Olga D. Hendrickson, Elena A. Zvereva, Anatoly V. Zherdev and Boris B. Dzantiev\*

Bach Institute of Biochemistry, Research Center of Biotechnology of the Russian Academy of Sciences, Leninsky prospect 33, 119071, Moscow, Russia; odhendrick@gmail.com (O.H.); zverevaea@yandex.ru (E.Z.); zherdev@inbi.ras.ru (A.Z.)

\* Correspondence: dzantiev@inbi.ras.ru; Tel.: +7-495-954-31-42

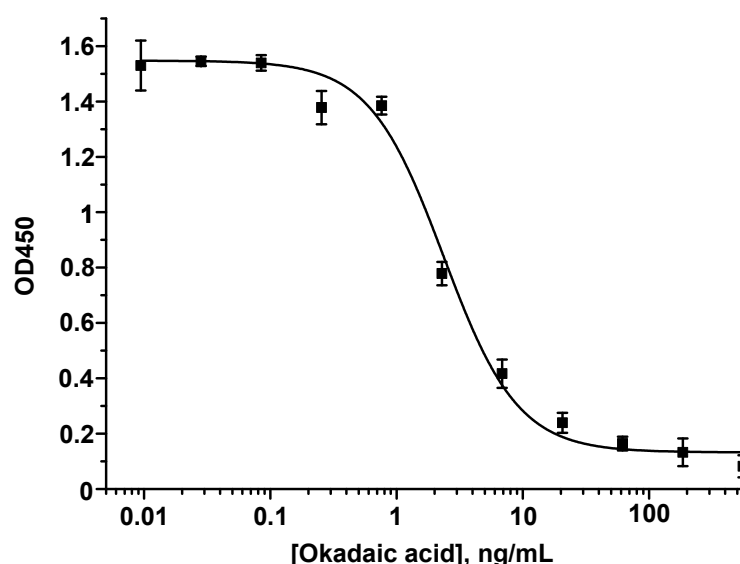

**Figure S1.** Calibration curve of OA in the indirect ELISA.

**Table S1.** Parameters varied during optimization.

| Parameter                                                        | Range of varied values | Selected value |
|------------------------------------------------------------------|------------------------|----------------|
| Concentration of OA-BSA in the T zone, ng/mL                     | 0.1–0.75               | 0.5            |
| Concentration of DAGI in the C zone, ng/mL                       | 0.05–0.5               | 0.1            |
| Concentration of anti-OA MAbs, µg/mL                             | 0.02–0.2               | 0.1            |
| Volume of GAMI-AuNPs, µL                                         | 2–5                    | 2.5            |
| Time of preincubation of the reaction mixture, min               | 2–5                    | 3              |
| Time of incubation of test strips with the reaction mixture, min | 10–20                  | 15             |
